# Supplementary material for: Effect of the Revisit Interval on the Accuracy of Remote Sensing-based Estimates of Evapotranspiration at Field Scales
Source: Copernicus journal article supplement (doi:10.5194/hess-2016-273), 2016-07-04
Supplement: Supplementary file [file hess-2016-273-AC1-supplement.pdf]

## RESPONSE TO REVIEWER COMMENTS

Effect of the Revisit Interval on the Accuracy of Remote Sensing-based Estimates of Evapotranspiration at Field Scales (hess-2016-273)

Note: The responses follow the reviewers' comments and I highlighted using **red** text. Excepted text from the revised manuscript is shown in **blue** with the changes underlined when appropriate.

### REVIEWER 1:

Subject of this study is the error introduced by 'temporal upscaling' of daytime evaporation as a function of the length of the interpolation interval. Temporal upscaling is used to estimate evaporation on days at which no direct evaporation data is available as  $E = f \cdot X$ .  $X$ , the reference quantity, is known on a daily basis, the scaling factor  $f$  is assumed to vary only gradually over time and is determined through interpolation. The analysis is based on solely in situ measurements of meteorological data, turbulent fluxes and the ground heat flux, from 20 Ameriflux sites. Interpolation intervals of 1 to 32 days and five different reference quantities and associated scaling factors are considered, using three interpolation techniques and four metrics to evaluate the self-persistence of the scaling factor and error in the scaling factor and evaporation estimate. The results are analyzed per land cover class (mean of 4-6 sites per class). The authors found that the autocorrelation of the scaling factor is limited for lag times larger than a few days; that the error in both  $f$  and  $E$  quickly increases with increasing interpolation interval during the first week, more slowly afterwards; and that both the lag time for a certain autocorrelation threshold and the interpolation interval for a certain relative error in the evaporation estimate is smallest for forests, followed by cropland, grassland and open canopy. The authors relate the differences between land cover types to the mean latent heat flux per land cover type (which is largest for forest, smallest for open canopy) and define an exponential function relating mean evaporation per land cover type with a maximum interpolation interval to achieve a relative error of  $x\%$ . Using the exponential relation they define a maximum return interval of 5 days to achieve a relative error in the evaporation estimate of maximally 20%.

The question the authors address in this paper is relevant for various applications of daily evaporation time series in e.g. water resources management and hydrology. The use of the relatively large set of Ameriflux sites covering different land cover types, climates, soil types, and covering many measurement years, makes the results – in potential – also more generally applicable than other literature on the subject. The authors however focus mainly on the practical implications of the results (selection of best interpolation technique and maximum return interval for a given accuracy of the evaporation estimate), than on understanding the why of the results (e.g. what actually explains the differences they find between and within land cover types and scaling approaches). This I think is a missed chance, given the data they have and the analysis they have already performed. The approach of Farah et al. (2004) for example, showing the seasonal variability of the evaporative fraction and trying to explain it, I find very useful in this respect as an additional analysis. Moreover although 20 Ameriflux sites 'distributed throughout the contiguous United States' have been used, the only information on the differences between the sites that is provided by the authors is the land cover class. The reader therefore cannot fully judge the representativeness of the results of this study, whereas given the practical focus of the analysis that should be a major benefit of this study. Of the comments below, at least comments 1,2,(3),7 and 8 I think should be addressed before publication of the manuscript.

### Specific comments

1. The title of the article, mentioning the accuracy of remote sensing-based estimates of evapotranspiration, is a bit misleading. Of course the results of this study provide an indication of the effect of the revisit time on the accuracy of RS based estimates, but this study does a) not actually use remote sensing based estimates, and b) the point scale results are not one-to-one transferable to remote sensing based results. I suggest to change the title, leaving out remote sensing.

Given the significance of temporal upscaling for remote sensing-based applications, which was indeed the impetus for this study, we feel it is important to acknowledge the importance of this study to remote sensing community. However, in light of the reviewer's comments, we agree the paper's title may be confusing to some readers and have modified it to clearly indicate that surface observations were used. The revised title reads:

## Insights into the Effect of the Revisit Interval on the Accuracy of Remote Sensing-based Estimates of Evapotranspiration Temporal Upscaling Studies using In Situ Observations

2. In the Introduction, p5, it is stated that perfect retrieval of the flux is assumed. If indeed the results found in this study are to be transferred to remotely sensed-based evaporation estimates, could the authors elaborate a bit on how realistic this assumption is, either in the introduction or in the discussion of the results? In other words, to what extent can the results based on the in situ, point scale measurements be applied for remotely sensed, usually more spatially aggregated, estimates?

Since any error in the modeled ET from remote sensing-based models would propagate into the estimates of the scaled quantities,  $f$ , used for the interpolation and then into the interpolated fluxes, the analysis conducted here represents a best-case scenario. This is now stated explicitly in the introduction. Additionally, the effects of any errors in the modeled fluxes on the maximum return interval and the conclusions drawn from the study are discussed.

Page 5, Line 11:

Since any errors in the remote sensing-based ET estimates propagate into the calculation of  $f$  and the subsequent temporal upscaling, this analysis represents the best-case scenario.

### Methods

3. I understand daytime mean evaporation instead of daily mean evaporation is used because of the better representativeness of the instantaneous scaling factor during satellite overpass. For many applications however (hydrological), daily evaporation estimates are valuable. It would be interesting if the authors could show whether the results for daily evaporation are very different. (Although also EC measurements are not that perfect in measuring nighttime fluxes (Fisher et al. 2007).)

We agree that daily ET can be very useful for many applications. This decision to focus on daytime mean data is the result of a number of considerations. This research was driven by a need to characterize the effects of temporal upscaling on remote sensing-based applications. Since the internal physics of most, if not all, remote sensing-based models for estimating ET – for example, the two source energy balance models (TSEB) – to describe the moisture flux accurately at night, daytime mean data was used to emulate the model output as closely as possible. Similarly, the assumption of self-preservation that underpins temporal upscaling is not valid at night. Finally, the contribution to the total moisture flux is typically small overnight; it averages between 3% and 8% for most land cover types (Rawson and Clark 1988; Green et al. 1989; Sugita and Brutsaert 1991; Malek, 1992; Tolk et al. 2006).

4. I like that different ‘reference quantities’ are analyzed, but are these selected because these are the ones that are used most often (so for application purposes mainly), or could the authors also elaborate a bit more on the expected differences in self-preservation of the associated scaling factors?

The reference quantities evaluated in this study were selected because they either have been proposed for use or are commonly used by the remote sensing community for the temporal upscaling of ET derived from remotely sensed imagery. This is now stated explicitly in the manuscript.

Page 6, Line 7:

Each of the  $\chi$  used in this study was selected because it is either in common usage for remote sensing-based applications or has been proposed for use in those applications.

5. I see value in using different evaluation metrics as long as the added value is clear. I wonder whether the authors could better explain the added value of  $D$  next to the RMSE and especially MAE, either in the methods section or in the results section. As it is presented now,  $D$  is just another metric, confirming the results of MAE.

As is now discussed in the paper, the index of agreement,  $D$ , provides similar information as RMSE and MAE in that it describes how well the interpolated data corresponds with the observations. The chief advantage of this metric is that it facilitates inter-comparisons because it quantifies the relative agreement on a scale from 0 (no agreement) to 1 (perfect agreement).

Page 8, Line 19:

However, since it bounded between zero, which indicates no agreement, and unity, which indicates perfect agreement,  $D$  both indicates the relative magnitude of the error and facilitates the comparison of the error from differing upscaling methods.

## Results

6. All results are shown as the mean value per land cover class. Although it is a logical choice to group the measurement sites per land cover class, I expect there to be considerable differences between the sites within a class reflecting differences in e.g. climate and other environmental conditions (as visible in Fig.1 as well). However, the authors do not comment on the 'within class' variability of the autocorrelation and for the remaining results the variability is not shown at all. I suggest to at least provide some additional information on the Ameriflux sites in Table 1 (at least climate and seasonality information) and to include information on the within class variability of all results, to inform the reader on a) the robustness and b) the representativeness of the analysis.

Per the reviewer's suggestion, additional information describing the climate at each of the sites has been added to Table 2. Additionally, a discussion of some of the potential reasons for the observed variability with a given land cover class has been added.

Page 9, Line 20:

The figure also shows there was significant variability from site-to-site within a given land cover type, particularly for longer lags. Although the specific causes of these differences are not fully understood, there are a number of factors that likely contribute. For example, there are differences in both species composition and climate at the various sites. Consider, as an example, the forest class which includes both coniferous and broadleaf deciduous forest. Moreover, the species composition varies even among sites of the same forest type; for example dominant species at the Niwot ridge site are Subalpine fir (*Abies lasiocarpa*) and Engelmann spruce (*Picea engelmannii*) while, as the name implies, the dominant species at the Loblolly Pine is loblolly pine (*Pinus taeda*). At the same time, the mean annual temperature at the forested sites ranged from 1.5 °C to 14.4 °C while the mean annual precipitation varied from 800 mm to 1372 mm. Similarly the mean annual temperature and precipitation at the cropland sites, which are all planted on a rotation of maize and soy, range between 6.4 °C and 11.0 °C and 789 mm and 991 mm, respectively.

7. In Figure 2 and Figure 9 the maximum lag time for a certain threshold of the auto-correlation and maximum return interval for a certain threshold of the relative error in evaporation estimate are plotted against the mean latent heat flux per land cover class. First, continuing on point 7, I wonder why the authors choose to plot the results for the mean latent heat flux per land cover class and not for all individual sites? Second, does there exist a similar relation between maximum lag time or return interval and latent heat flux for the data of one site? Furthermore, I would like to know whether the authors did consider other dependencies of maximum lag time (Fig.2) and maximum return interval (Fig.9) than the mean latent heat flux?

Although the same general trends are evident when the data from the individual sites are used, the relationships were rather noisy. Therefore, the means for a given land cover type was used in lieu for clarity. The aim of this paper was to explore the effects of temporal upscaling on the accuracy of ET estimates and, with that in mind, the relationships between the mean flux and both the autocorrelation or maximum return interval is shown as a guideline for selecting an appropriate return interval. They are not intended to suggest causality. Indeed, the underlying cause of the relationships is unclear.

Additionally, although it falls outside the intent of the paper, several analyses – for example, an investigation of atmospheric coupling (McNaughton and Jarvis, 1983) - were conducted in an effort to discern the fundamental cause of the relationships between the magnitude of the moisture flux and both the autocorrelation and maximum return interval. Unfortunately, these did not yield fruitful results and the data available at all of the sites is insufficient to conduct the extensive earth system modeling efforts needed to ascertain the underlying cause of the relationships.

8. Page 8-9. The authors show and describe the results concerning the RMSE and MAE of the scaling factor as a function of itself (75% of its maximum reached after xx days). Could these values be related to the absolute value of the scaling factor as well? Or in other words, how does the relative error in  $f$  develop as a function of the lag? Idem for the evaporation estimates (Page 9).

This comment is unclear. Both the text and associated figures describe the error as a function of the lag (return interval). The reference to the amount of time needed to reach 75% of the maximum is given simply to highlight how quickly the error increase for short lag times. To improve the clarity, the mean maximum RMSE and MAE is given for each land use type.

Page 10, Line 10:

For comparison, the mean maximum RMSE for each land cover type was 0.26, 0.28, and 0.17 for croplands, grasslands, forest, and open canopies, respectively. Although it also increased logarithmically, the amount of time needed for MAE to reach 75% of the peak value was more variable, ranging between 5 to 10 days. Again, for purposes of comparison, the mean maximum MAE was 0.22, 0.14, 0.16, and 0.10, respectively, for croplands, grasslands, forest, and open canopies.

9. I think that it may not be necessary to show Figures 5 and 6. The results for the scaling factor already provide enough ground to prefer linear interpolation above spline interpolation methods, so Figure 7 summarizes the relevant information on the development of the error in evaporation estimates with increasing interpolation interval. (Although it is interesting why the MAE in the evaporation estimate for forested sites is lowest for  $R_n$  as reference quantity (compared to the other reference quantities), whereas the MAE for the associated scaling factor is largest of all scaling factors?)

While we appreciate the reviewer's suggestion, we respectfully disagree. The additional figures not only reinforce the benefit of using linear interpolation, they also show how the errors associated with the scaled quantities are propagated into the final flux estimates. By comparing the figures, the reader can clearly see that the errors in the interpolated values of the scaled quantities are mirrored in the errors in flux estimates.

10. As I understand, in the analysis as presented here, all measurement days are grouped without differentiating between e.g. seasons, phenological stages, sowing and harvest dates, cloudiness (apart from on days that are used for interpolation) and moisture availability. I'm curious whether the authors did consider doing the analysis for e.g. the growing season only, since the variability of the evaporative fraction most likely changes with the seasons (water availability, phenology (e.g. Farah et al. 2004). For applications in water resources management one might be especially interested in evaporation during the growing season and I wonder whether the maximum interval would be different.

Preliminary analyses indicate there is a seasonal pattern in the magnitude of the error with the greatest discrepancy occurring during growing season when the magnitude of the fluxes is also greatest. However, when the error is considered in relative terms, the seasonal effect vanishes. As a result, the maximum return interval would not change with the time of year.

11. It would be informative if the authors could include some figures showing the actual latent heat flux for all land cover types or preferably sites (e.g. the average annual cycle per land cover type/site), so that the reader gets some more insight into the daily and seasonal variability of the latent heat flux and evaporative fraction itself, before showing the thereof derived analysis of self-preservation of the scaling factor and interpolation errors.

Per the reviewer's suggestion a figure showing the annual pattern of the mean daytime latent heat flux for each land cover type has been added to the manuscript.

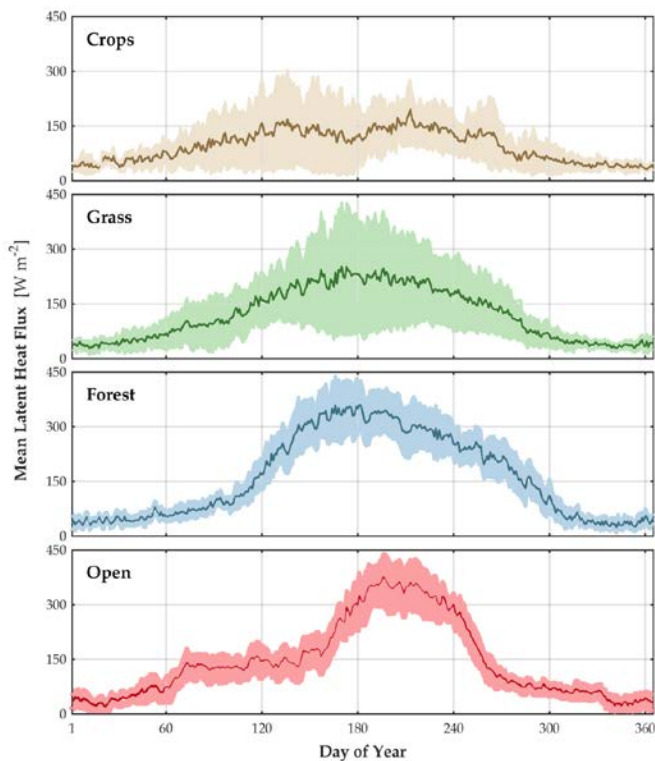

Figure 2 The mean daytime latent heat flux is shown for each of the land cover types. The mean flux was calculated using the daytime mean flux data for all of the years considered at each site. The shaded area represents one standard deviation about the mean.

#### Minor and technical comments

12. Although one can figure out what is meant, the authors may want to go through the introduction again and clarify / restructure the text here and there. For example page 6, lines 19-26 could be rewritten a bit more clearly. I understand it like this: Based on the daily time series time series with intervals of 2 to 32 days are generated. Per interval of length  $n$  we generate the  $n$  possible unique time series starting at the first  $n$  days of the daily series, to maximize the robustness of the statistical analysis. The generated time series were subsequently filtered for clouded days.

Although the reviewer has it exactly right, we agree that the paragraph referred to above is awkward. It has been rewritten to improve clarity. Additionally, the entire paper has been carefully proofread and additional revisions were made when needed to improve clarity or correct typographic errors.

The text the reviewer refers to now reads:

Page 7, Line 13:

For this analysis, temporal upscaling was conducted at each of the Ameriflux sites using all possible combinations of  $f$  and interpolation methods. Specifically, it was conducted with data representing return intervals of up to 32 day generated from the daytime mean data at each site. In order to maximize the robustness of the statistical analysis, all possible realizations - the unique yet equivalent time series that can be generated from the data collected at a particular site while maintaining constant return interval – were considered in the analysis. The total number of possible realizations for a given return interval is equal to the length of the return interval. The individual realizations were generated by beginning the time series on consecutive days.

13: I would include the variable and unit on the y-axis, at least in the top left panel of the figure (in stead of fx, everywhere).

Figures 1, 2, 5, and 6 indicate the variable used by the scaling function as a subscript; for example, the scaling metric associated with the available energy is denoted  $f_A$  while the one associated with net radiation is denoted  $f_{Rn}$ . In all cases, the scaled metric is dimensionless.

14. Page 4, line 15: I think Lhomme and Elguero (1999) were one of the first to describe the influence of clouds on the self-preservation of the evaporative fraction? I suggest to include the reference and maybe skip the word recent.

Per the reviewer's suggestion, the reference has been added. The sentence was also revised to improve clarity.

Page 4, Line 29:

Similarly, [Lhomme and Elguero \(1999\)](#) and later Van Niel et al. (2012) showed that the degree of self-preservation can be influenced by cloud cover.

15. For clarity, could the formulae of the five scaling factors and reference quantities be provided? Page 5, line 26: how is the available energy defined? I suppose you use  $A = Rn - G$ ? Or are other (e.g. change of energy storage in the canopy) terms involved?

Per the reviewer's suggestion, available energy is now explicitly defined as the net radiation less the soil heat flux in the manuscript. The calculation of the remaining reference quantities that are derived from other measurements, i.e.  $\lambda E_0$  and  $\lambda E_{eq}$ , are formally defined in section 2.2.

Page 4, Line 18:

For example, it is quite common to estimate ET expressed in terms of the latent heat flux ( $\lambda E$ ) using the available energy ( $A$ ), [here defined as the net radiation less the soil heat flux](#), as the reference quantity and evaporative fraction ( $f_A$ ) as the scaled metric (e.g. Crago and Brutsaert, 1996; Bastiaanssen et al., 1998; Suleiman and Crago, 2004; Colaizzi et al., 2006; Hoedjes et al. 2008; van Niel et al., 2011; Delogu et al., 2012).

16: Page 6, line 28. The threshold for a cloud free day seems to tolerate quite some cloudiness? On what is the 25% based?

Preliminary analyses comparing the relatively simple model output with the observed incident solar radiation using known clear sky data showed agreement to within  $\pm 10\%$ . To be confident that cloud cover was present, the 25% threshold was selected. This is now stated in the paper.

Clear-sky days were identified as those where the daytime mean of the measured  $K_{\downarrow}$  was within 25% of the predicted value from a simple radiation model; [this threshold was selected based on a preliminary analyses comparing the model results with observations on known clear-sky days.](#)

17. Page 7, line 1: What is the total length of the observation time series after removal of the clouded days?

A sentence has been added indicating that a minimum of 1200 days was considered the analyses at each site.

Page 7, Line 27:

Although the number of days flagged due to cloudy conditions and omitted from subsequent analyses varied depending on the site and the return interval being modelled, at least 1200 days were considered for each of the analyses at each site.

18: Page 7, line 22-26. The authors could better explain the use of the ‘necessary transforms’.

The section has been revised to better explain why the transforms are needed and how they were conducted. In part, it now reads:

Page 8, Line 24:

The aggregation was accomplished by calculating the arithmetic means after conducting any necessary transform. For example, both the auto-correlation and RMSE are non-additive quantities that cannot be averaged directly; instead, they must first be transformed into an additive quantity. In the case of the former, the auto-correlation was aggregated by averaging the results for the individual analysis periods at each of the sites after applying a Fisher z-transformation (Burt and Barber, 1996). Similarly, the RMSE data was averaged after first transforming it to the mean square error.

20: Typos:

Page 3, Line 31: presence of  
Corrected

Page 4, Line 8:

This infrequent acquisition of imagery is due to both lengthy return intervals and the presence of cloud cover (Ryu et al., 2012; van Niel et al., 2012; Cammalleri et al., 2013).

Line 33: referred to as

Corrected

Page 4, Line 11:

To provide temporally continuous ET estimates, the moisture flux during the period between data acquisitions is often estimated using an interpolation technique commonly referred to as temporal upscaling.

Page 4, Line 22: dot behind (Van Niel et al. 2012)

This sentence has been deleted in response to a suggestion from Reviewer 2.

Line 26: For example, [something missing?] and Tasumi et al,

The spurious word “and” has been deleted.

Page 4, Line 34:

For example, Tasumi et al. (2005) proposed using the reference ET for alfalfa ( $ET_r$ ) as  $\chi$ ; later, Allen et al. (2007) proposed using the standardized reference evapotranspiration ( $ET_0$ ) as  $\chi$ .

Line 30: no dot behind time

The period has been deleted.

Page 5, Line 2:

As a result,  $f$  derived from  $ET_r$  or  $ET_0$  can be treated in much the same fashion as a crop coefficient and assumed to be nearly constant changing only slowly with time (Colaizzi et al., 2006; Chavez et al., 2009).

Page 5, Line 13: Delete Namely

Deleted per the reviewer’s request

Page 5, Line 21:

These are *i.* croplands (maize (*Zea mays*)/soy (*Glycine max*) rotation); *ii.* grasslands; *iii.* forests (evergreen needleleaf and broadleaf deciduous); and, *iv.* open-canopy (shrubland and woody savanna).

Line 18: while/by maintaining

Corrected

Page 5, Line 26:

After forcing closure of the energy balance while maintaining a constant Bowen ratio (Twine et al. 2000) in order to more closely match the characteristics of the output from the models, the 30-minute measurements were used to calculate the various  $\chi$  and  $f$ .

Page 7, Line 22: Once calculated for the individual the sites

Corrected

Page 8, Line 20:

Once calculated for the individual the sites, the statistics were aggregated to represent the typical results for a given land cover type.

Page 8. Line 13: Derived from meteorological data

Corrected

Page 9, Line 12:

Nonetheless, there were statistically significant, albeit modest, differences between the auto-correlation functions associated with  $f$  derived from evaporative fraction analogues and those derived from meteorological data.

Line 14: associated with

Corrected

Page 9, Line 14:

Regardless of land cover,  $\rho$  associated with  $f_{K\downarrow}$ ,  $f_{Rn}$ , and  $f_A$ , tended to be greater than  $\rho$  associated with either  $f_{\lambda EO}$  or  $f_{\lambda Eq}$ .

Line 28. 'Interpolated estimates of each X', must be 'each f' I think?

Corrected

Page 10, Line 5:

Both RMSE and MAE of the interpolated estimates of each  $f$  were calculated for all land cover types and return intervals up to 32 days.



## References

- Farah, H. O., W. G. M. Bastiaanssen, and R. A. Feddes (2004). Evaluation of the temporal variability of the evaporative fraction in a tropical watershed. *International Journal of Applied Earth Observation and Geoinformation* 5.2 (2004): pp. 129-140.
- Fisher, J.B., D. D. Baldocchi, L. Misson, T. E. Dawson, and A. H. Goldstein (2007). What the towers don't see at night: nocturnal sap flow in trees and shrubs at two Ameriflux sites in California. *Tree Physiology*, 27 (4) (2007): pp. 597–610. doi: 10.1093/treephys/27.4.597.
- Lhomme and Elguero (1999). Examination of evaporative fraction diurnal behaviour using a soil-vegetation model coupled with a mixed-layer model. *Hydrol. Earth Syst. Sci.*, 3 (2) (1999), pp. 259–270
- Green, SR, McNaughton, K, Clothier, BE. 1989: Observations of night-time water use in kiwifruit vines and apple trees. *Agric. For. Meteorol.* 48,251–261.
- Malek, E. 1992: Night-time evapotranspiration vs. daytime and 24 h evapotranspiration. *J. Hydrol.* 138, 119-129.
- McNaughton, KG, Jarvis, PG, 1983: Predicting effects of vegetation changes on transpiration and evaporation. In: Kozlowski, TT (Ed.), *Water Deficits and Plant Growth*, vol. VII. Academic Press, pp. 1–47.
- Rawson, HM, Clarke, JM. 1988: Nocturnal transpiration in wheat. *Aust. J. Plant Physiol.* 15, 397–406.
- Sugita, M, Brutsaert, W. 1991: Daily evaporation over a region from lower boundary layer profiles measured with radiosondes. *Water Resour. Res.* 27, 747–752.
- Tolk, JA, Howell, TA, Evett, SR. 2006: Nighttime evapotranspiration from alfalfa and cotton in a semiarid climate. *Agron. J.* 98, 730–736.
